# Supplementary material
Source: PubMed Central journal article supplement (PMC6707861)
Supplement: NIHMS1532792-supplement-2.pdf [file NIHMS1532792-supplement-2.pdf]

# Supplementary Figure S1

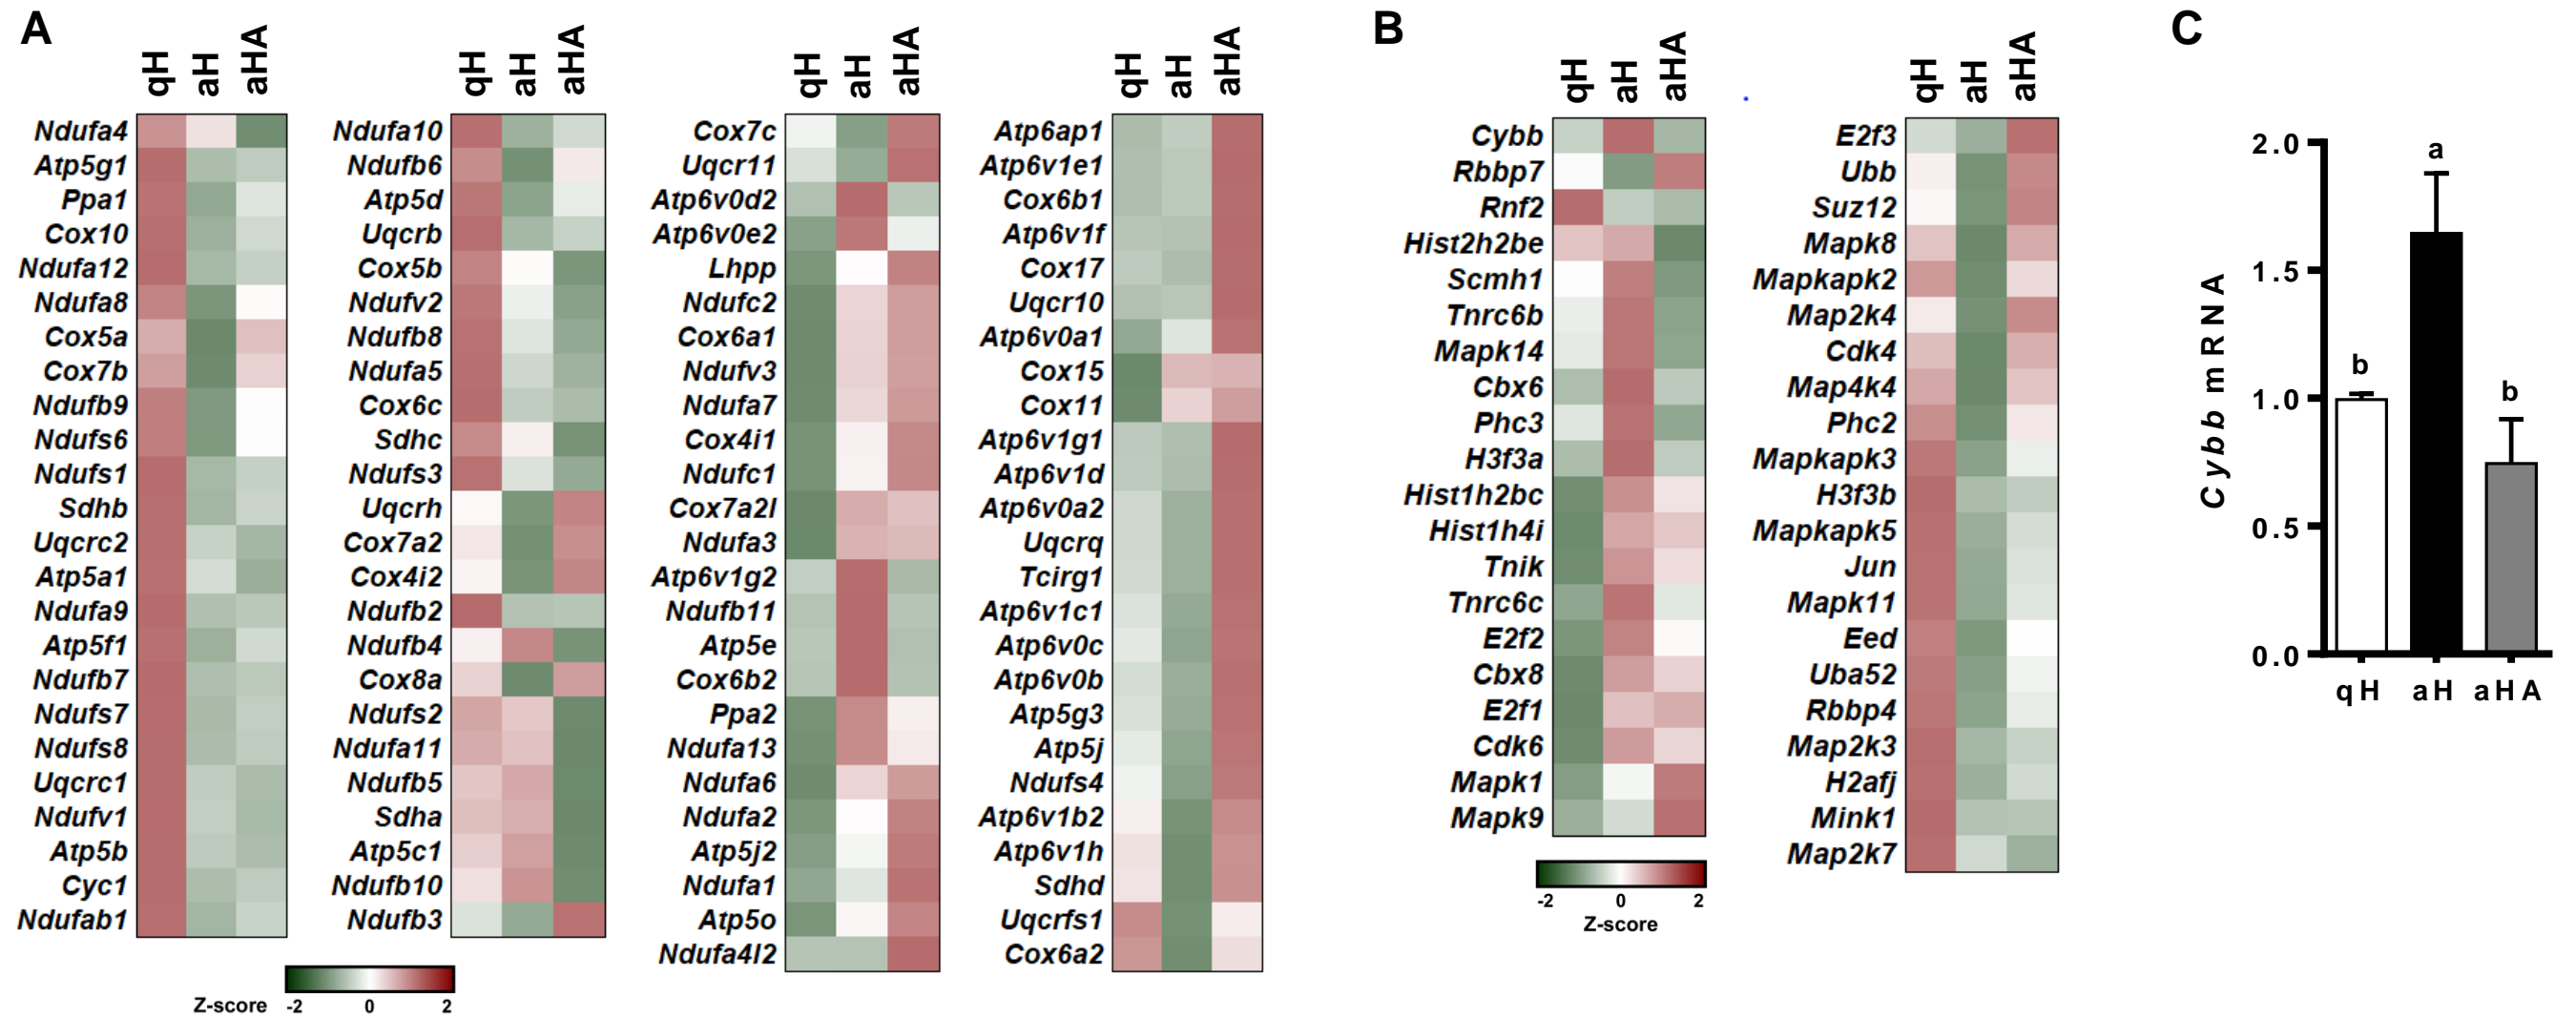

**Supplementary Figure 1.** Heatmap of genes related to oxidative phosphorylation (**A**), oxidative stress (**B**), and RT-qPCR for *Cybb* expression (**C**) were conducted. Bars sharing a common letter are not significantly different ( $P \geq 0.05$ ). \*,  $P < 0.05$ .

# Supplementary Figure S2

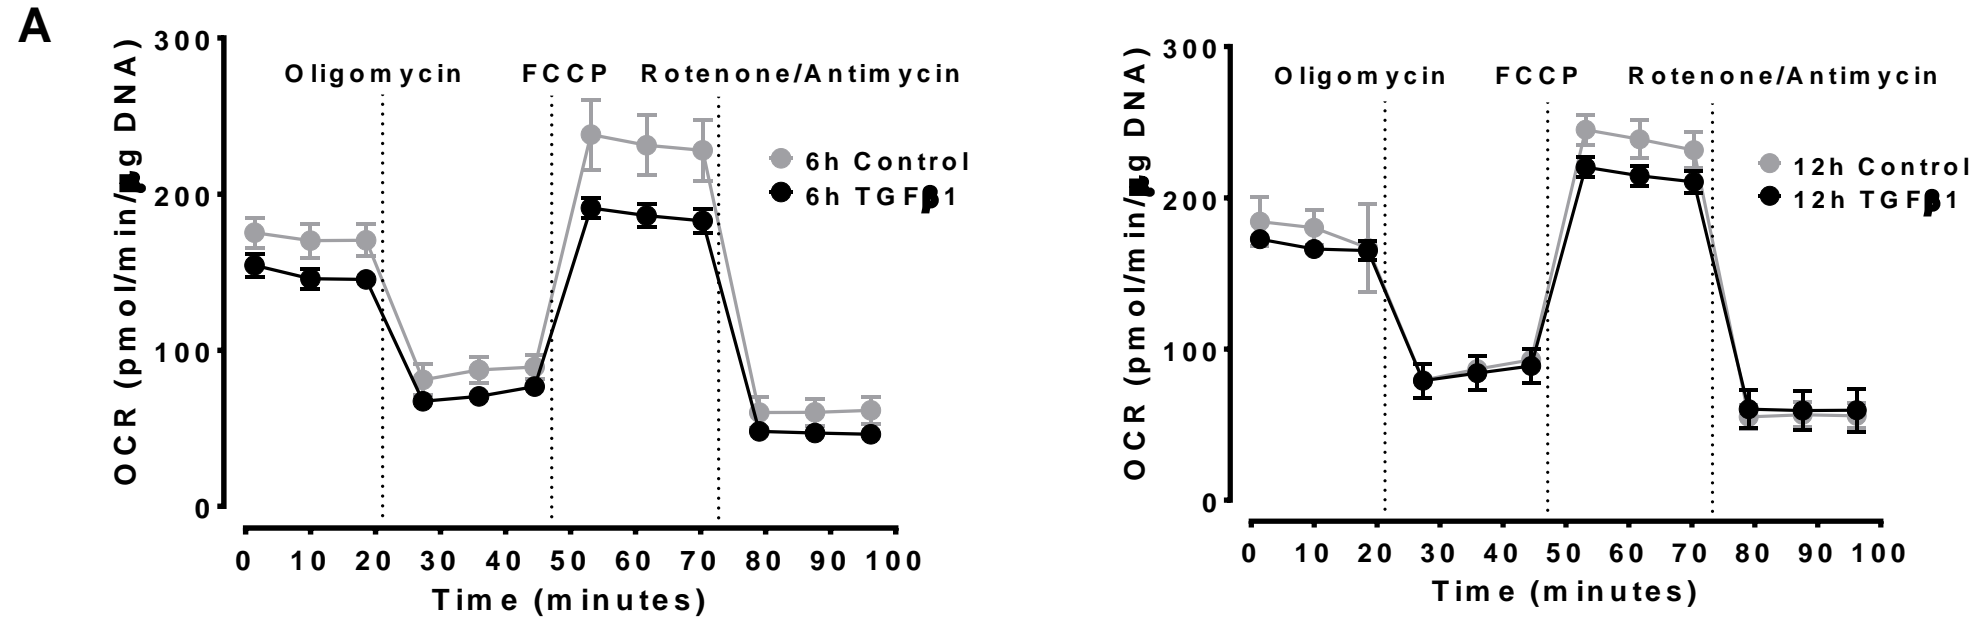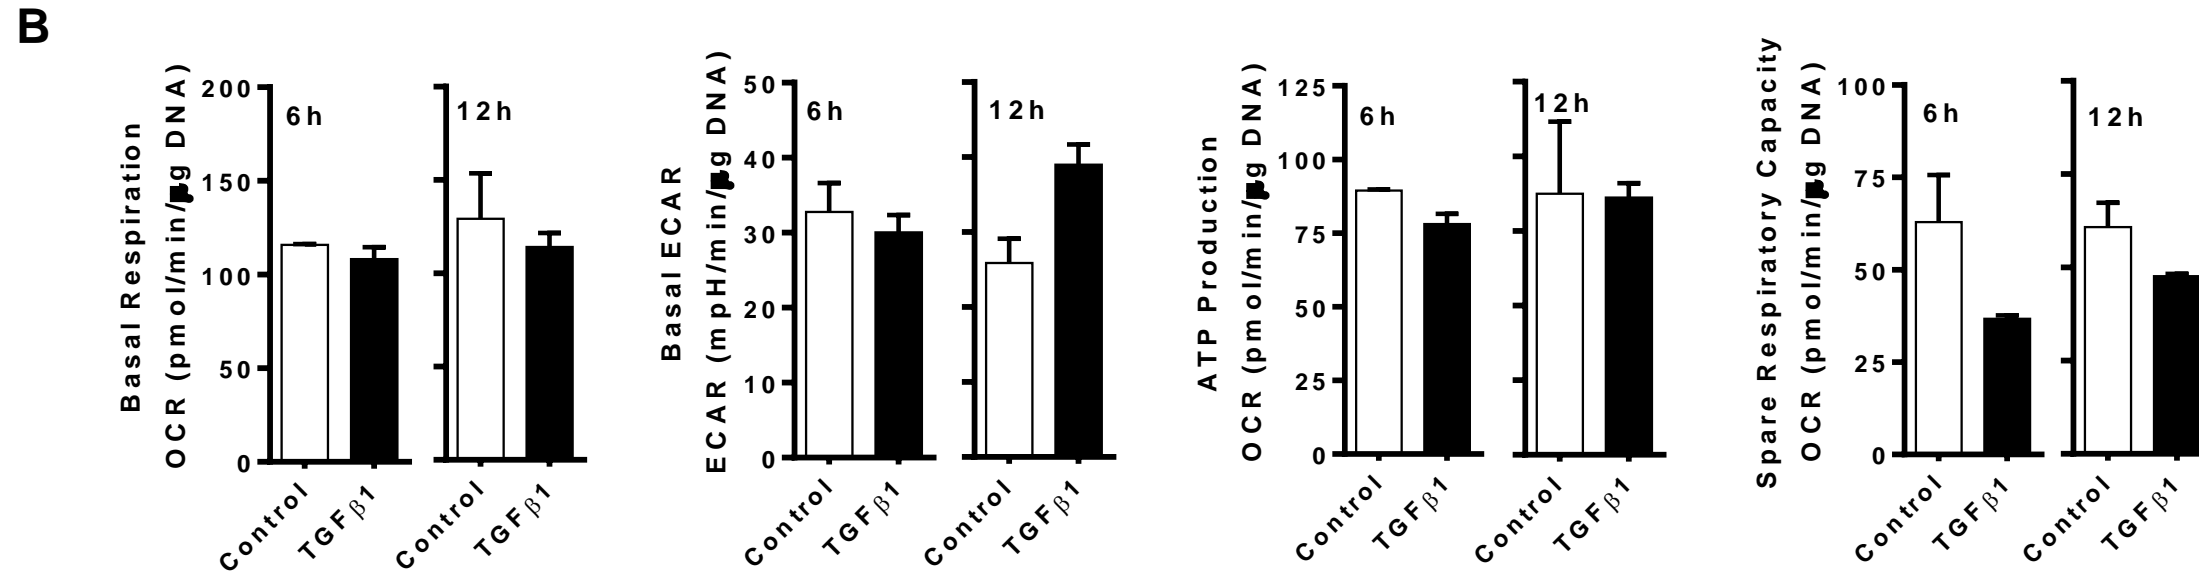

**Supplementary Figure 2.** The effect of TGF $\beta$ 1 on mitochondrial respiration in LX-2 cells. LX-2 cells were treated with 4 ng/mL of TGF $\beta$ 1 for 6 or 12 h to conduct Mitostress test. \*,  $P < 0.05$ .
